---

# Graphein - a Python Library for Geometric Deep Learning and Network Analysis on Protein Structures and Interaction Networks

---

Arian R. Jamasb<sup>1,2\*</sup>, Ramon Viñas<sup>2</sup>, Eric J. Ma<sup>3</sup>, Charlie Harris<sup>4</sup>, Kexin Huang<sup>5</sup>,  
Dominic Hall<sup>1</sup>, Pietro Lió<sup>2\*</sup>, Tom L. Blundell<sup>1</sup>

<sup>1</sup> Department of Biochemistry, University of Cambridge

<sup>2</sup> Department of Computer Science & Technology, University of Cambridge

<sup>3</sup> PyMC Labs

<sup>4</sup> Department of Life Sciences, Imperial College London

<sup>5</sup> Department of Computer Science, Stanford University

## Abstract

1 Geometric deep learning has well-motivated applications in the context of biology,  
2 a domain where relational structure in datasets can be meaningfully leveraged.  
3 Currently, efforts in both geometric deep learning and, more broadly, deep learning  
4 applied to biomolecular tasks have been hampered by a scarcity of appropriate  
5 datasets accessible to domain specialists and machine learning researchers  
6 alike. However, there has been little exploration of how to best to integrate  
7 and construct geometric representations of these datatypes. To address this, we  
8 introduce Graphein as a turn-key tool for transforming raw data from widely-used  
9 bioinformatics databases into machine learning-ready datasets in a high-throughput  
10 and flexible manner. Graphein is a Python library for constructing graph and  
11 surface-mesh representations of protein structures and biological interaction  
12 networks for computational analysis. Graphein provides utilities for data retrieval  
13 from widely-used bioinformatics databases for structural data, including the  
14 Protein Data Bank, the recently-released AlphaFold Structure Database, and  
15 for biomolecular interaction networks from STRINGdb, BioGrid, TRRUST  
16 and RegNetwork. The library interfaces with popular geometric deep learning  
17 libraries: DGL, PyTorch Geometric and PyTorch3D though remains framework  
18 agnostic as it is built on top of the PyData ecosystem to enable inter-operability  
19 with scientific computing tools and libraries. Graphein is designed to be highly  
20 flexible, allowing the user to specify each step of the data preparation, scalable  
21 to facilitate working with large protein complexes and interaction graphs, and  
22 contains useful pre-processing tools for preparing experimental files. Graphein  
23 facilitates network-based, graph-theoretic and topological analyses of structural  
24 and interaction datasets in a high-throughput manner. As example workflows, we  
25 make available two new protein structure-related datasets, previously unused by  
26 the geometric deep learning community. We envision that Graphein will facilitate  
27 developments in computational biology, graph representation learning and drug  
28 discovery.

29  
30 **Availability and implementation:** Graphein is written in Python. Source code,  
31 example usage and tutorials, datasets, and documentation are made freely available  
32 under the MIT License at the following URL: [graphein.ai](https://graphein.ai)

---

\*To whom correspondence should be addressed: [arj39@cam.ac.uk](mailto:arj39@cam.ac.uk), [pl219@c1.cam.ac.uk](mailto:pl219@c1.cam.ac.uk)

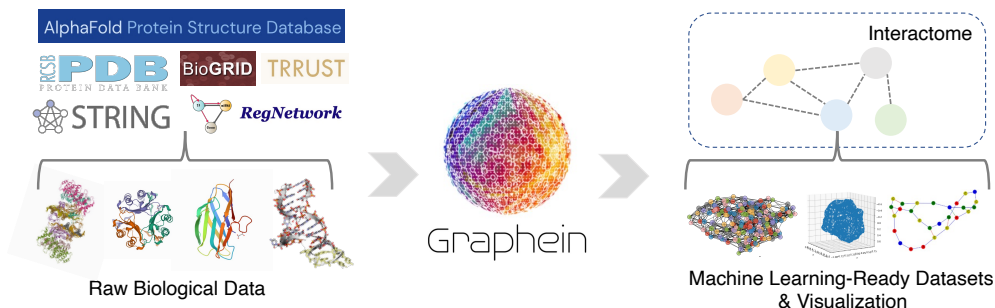

Figure 1: Graphein rapidly transforms and integrates raw biological data into actionable machine learning-ready datasets.

## 33 1 Introduction

34 Geometric deep learning refers to the application of deep learning methods to data with an underlying  
35 non-Euclidean structure, such as graphs or manifolds [1]. These methods have already been applied  
36 to a number of problems within computational biology and computational structural biology [2, 3,  
37 4, 5, 6, 7, 8], and have shown great promise in the contexts of drug discovery and development [9].  
38 Geometric deep learning libraries have been developed, providing graph representation functionality  
39 and in-built datasets - typically with a focus on small molecules [10, 11]. Featurisation schemes  
40 and computational analysis of small molecular graphs are a mature area of research. However, data  
41 preparation for geometric deep learning in structural biology and interactomics is yet to receive the  
42 same attention. Protein function is intricately tied to the underlying molecular structure which is  
43 significantly more complex than small molecules. Protein graphs can be populated at different levels  
44 of granularity, from atomic-scale graphs similar to small molecules, to residue-level graphs. The  
45 relational structure of the data can be captured via spatial relationships or higher-order intramolecular  
46 interactions which are not present in small molecule graphs. Furthermore, many biological functions  
47 are mediated by interacting biomolecular entities, often through direct physical contacts governed by  
48 their 3D structure. As a result, greater control over the data engineering and featurisation process of  
49 structural data is required. Little attempt has been made to explore the effect of graph representations  
50 of biological structures and to unify structural data and interaction data in the context of machine  
51 learning. Graphein is a tool to address these issues by providing flexibility to researchers, decrease  
52 the time required for data preparation and facilitate reproducible research.

53 Proteins form complex three dimensional structures to carry out cellular functions. Decades of  
54 structural biology research and recent developments in protein folding have resulted in a large pool  
55 of experimentally-determined and modelled protein structures with massive potential to inform  
56 future research [12, 13]. However, it is not clear how best to represent these data in machine  
57 learning experiments. 3D Convolutional Neural Networks (3DCNNs) have been routinely applied  
58 to grid-structured representations of protein structures and sequence-based methods have proved  
59 commonplace [14, 15, 16]. Nonetheless, these representations fail to capture relational information  
60 in the context of intramolecular contacts and the internal chemistry of the biomolecular structures.  
61 Furthermore, these methods are computationally inefficient due to convolving over large regions of  
62 empty space, and computational constraints often require the volume of the protein considered to  
63 regions of interest, thereby losing global structural information. For instance, in the case of protein-  
64 ligand interaction and binding affinity prediction, central tasks in data-driven drug discovery, this often  
65 takes the form of restricting the volume to be centred on a binding pocket, thereby losing information  
66 about allosteric sites on the protein and possible conformational rearrangements that contribute  
67 to molecular recognition. Furthermore, 3D volumetric representations are not translationally and  
68 rotationally invariant, deficiencies that are often mitigated using costly data augmentation techniques.  
69 Graphs suffer relatively less from these problems as they are translationally and rotationally invariant.  
70 Structural descriptors of position can be leveraged and meaningfully exploited by architectures such  
71 as Equivariant Neural Networks (ENNs), which ensure geometric transformations applied to their  
72 inputs correspond to well-defined transformations of the outputs.

73 Proteins and biological interaction networks can very naturally be represented as graphs at different  
74 levels of granularity. Residue-level graphs represent protein structures as graphs where the nodes con-  
75 sist of amino-acid residues and the edges the relations between them - often based on intramolecular  
76 interactions or euclidean distance-based cutoffs. Atom-level graphs represent the protein structure in  
77 a manner consistent with small-molecule graph representations, where nodes represent individual  
78 atoms and edges the relations between them - often chemical bonds or, again, distance-based cutoffs.  
79 The graph structure can further be elaborated by assigning numerical features to corresponding nodes  
80 and edges as well as the whole graph. These features can represent, for instance, chemical properties  
81 of the residue or atom-type, secondary structure assignments or solvent accessibility metrics of  
82 the residue. Edge features can include bond or interaction types, or distances. Graph features can  
83 included functional annotations or sequence-based descriptors. In the context of interaction networks,  
84 structural data can be overlaid on protein nodes providing a multi-scale view of biological systems  
85 and function. Graphein provides a bridge for geometric deep learning into structural interactomics.

86 Graph representations of proteins have a history of successful applications in machine learning  
87 and structural analysis projects in structural biology [17, 18, 19]. Web-servers for computing  
88 protein structure graphs exist [20, 21], however the lack of fine-grained control over the construction  
89 and featurisation, public APIs for high-throughput programmatic access, ease of integrating data  
90 modalities, and incompatibility with deep learning libraries motivated the development of Graphein.

## 91 2 Related Work

92 Geometric deep learning methods have demonstrated their suitability for tasks across domains. In  
93 part, this has been fuelled by the development of libraries that provide easy access to non-Euclidean  
94 data objects and models from the literature. Deep Graph Library (DGL) [10] and PyTorch Geometric  
95 [11] are the main open-source frameworks built for PyTorch [22]. Other, less established, tools  
96 include: Graph Nets [23] for Sonnet [24]/Tensorflow [25] and Jraph [26] for JAX [27].

97 In-built dataset support is a common feature of geometric deep learning frameworks. More specialised  
98 libraries, such as DGL-LifeSci, DeepChem and TorchDrug, provide datasets, featurisation, neural  
99 network layers and pre-trained models for tasks involving small molecules in the life sciences,  
100 computational chemistry and drug development [28, 29, 30]. TorchDrug and DeepChem provide  
101 reinforcement learning environments to fine tune generative models for physicochemical properties  
102 such as drug-likeness (QED) and lipophilicity (LogP). Therapeutics Data Commons provides ML-  
103 ready datasets for small molecule and biologics tasks but with no protein structural datasets [31].

104 Biomolecular tasks are included in many graph representation learning benchmarks. The Open  
105 Graph Benchmark (OGB) includes graph property prediction tasks on small molecules, link pre-  
106 diction tasks (ogbl-ppa) based on protein-protein interaction prediction and a biomedical knowl-  
107 edge graph (ogbl-biokg), and a node classification task based on prediction of protein function  
108 (ogbn-proteins) [32]. The TUDataset contains three biologically-motivated benchmark datasets  
109 for graph classification, (PROTEINS, ENZYMES and DD) relevant to applications in structural biology  
110 [33]. For PROTEINS and DD the goal is to predict whether or not a protein is an enzyme and these are  
111 derived from the same data under differing graph construction schemes [34, 35]. ENZYMES provides  
112 a task based on assigning Enzyme Commission (EC) numbers to graph representations of enzyme  
113 structures derived from the BRENDA database [36]. More recently, ATOM3D provides a collection  
114 of benchmark datasets for structurally-motivated tasks on biomolecules and show leveraging struc-  
115 tural information consistently improves performance, and that the choice of architecture significantly  
116 impacts performance depending on the context of the task [37].

117 Whilst tools exist for converting protein structures into graphs, they typically focus on visualisation  
118 and leave much to be desired for deep learning practioners. GraProStr is a web-server that enables  
119 users to submit structures for conversion into a graph which can be downloaded as textfiles [38].  
120 This provides users with limited control over the construction process, low-throughput and limited  
121 featurisation support. Furthermore GraProStr provides no utilities for machine learning or unifying  
122 structural and interactomic data o. Mayavi, and GSP4PDB & LIGPLOT provides utilities for  
123 visualising protein structures and protein-ligand interaction as graphs, respectively. [39, 40, 41].  
124 Bionoi is a library for representing protein-ligand interactions as voronoi diagram images specifically  
125 for applications in machine learning [42],

126 The protein structure prediction model AlphaFold2 is perhaps the most promising example of  
 127 geometric deep learning applied to structural biology. Highly-accurate protein structure prediction  
 128 using AlphaFold2 has been applied at the proteome scale to humans and 20 key model organisms  
 129 [13, 43]. As a result of these developments, we anticipate a significant amount of growth in the  
 130 availability of protein structural and interaction data in the coming years. In particular, we identify  
 131 structural interactomics as an emerging area for geometric deep learning as sparse structural coverage  
 132 of the interactome can be infilled with modelled structures. The question of how to best leverage  
 133 and integrate these data with other modalities remains. A recent review of biomedical knowledge  
 134 graph datasets identifies graph composition, feature and metadata incorporation and reproducibility  
 135 as key challenges [44]. We have developed Graphein to address these issues and ensure these data are  
 136 accessible to computational scientists.

### 137 3 Graphein

138 Graphein provides utilities for constructing geometric representations of protein and RNA structures,  
 139 protein-protein interaction networks, and gene regulatory networks. The library is designed for both  
 140 novice and expert users through the use of a high or low-level API. The high-level API takes standard  
 141 biological identifiers and a configuration object as input to yield basic geometric representations of the  
 142 input data. The low-level API offers a detailed customisation of the graph selection from the input data,  
 143 allowing users to define their own data preparation, graph construction and featurisation functions in  
 144 a consistent manner. Graphein is built on the PyData Stack to allow for easy inter-operability with  
 145 standard scientific computing tools and deep learning framework agnosticism. Graphein is organised  
 146 into submodules for each of the modalities it supports (Figure 2).

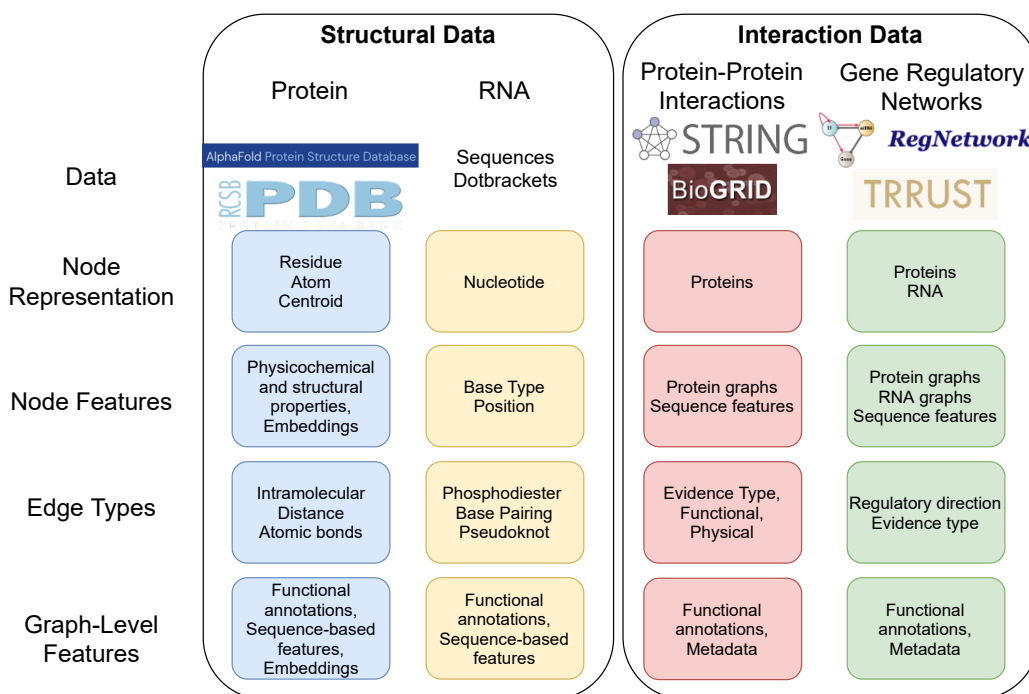

Figure 2: Overview of graph and mesh construction and featurisation schemes for data modalities supported by Graphein. Modules are inter-operable allowing protein or RNA structure graph construction to be applied to nodes in regulatory networks.

#### 147 3.1 Protein Structure Graphs

148 Graphein interfaces with the PDB and the AlphaFold Structure Database to create geometric representations of protein structures. Furthermore, users can supply their own .pdb files, enabling pre-processing with standard bioinformatics tools and pipelines. An overview of featurisation schemes is provided in Supplementary Information A.

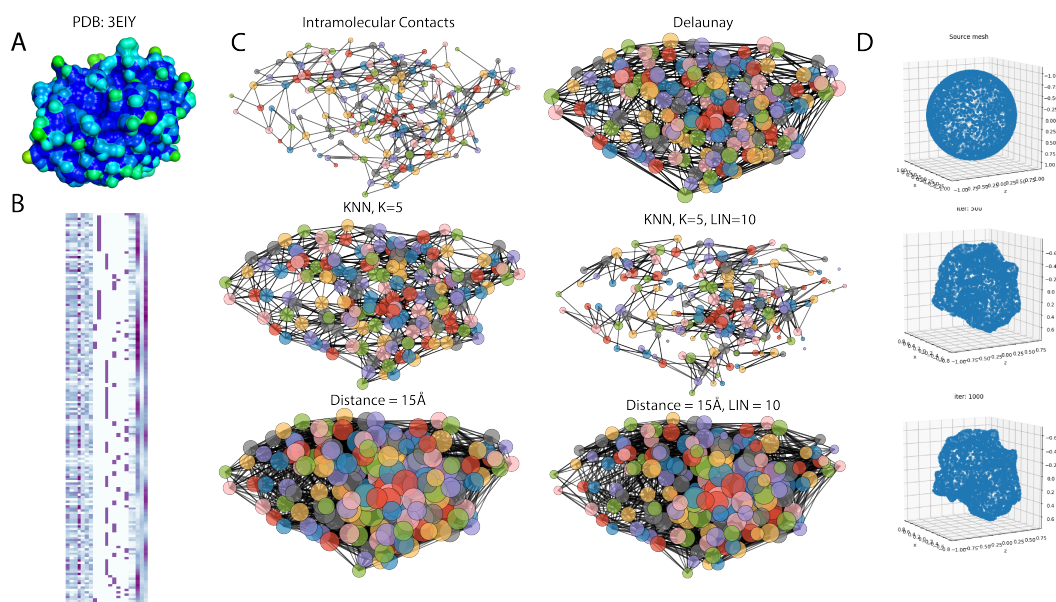

Figure 3: Example protein structure outputs from Graphein. (A) Example protein surface (3ey). (B) Example node feature matrix for a residue-level graph. Features include low-dimensional amino acid embeddings, secondary structure assignments, solvent accessibility and  $x$ ,  $y$ ,  $z$  positions of nodes. (C) Graphs computed from  $\alpha$ -carbons in the example protein under a variety of edge construction schemes. Node sizes correspond to degree. (D) Deformation of an icosphere to the example protein mesh constructed by Graphein in PyTorch3D

### 152 3.1.1 Node Representations

153 Graphs can be constructed for all chains contained within a polypeptide structure, or for a user-  
154 defined selection of chains. This is useful in contexts where regions of interest on a protein may be  
155 localised to a single chain. For residue-level graphs, users can choose between atom-based positional  
156 information, or sidechain centroid. Sidechain centroids are calculated as the centre of gravity of the  
157 deprotonated residue. Residue-level graph nodes can be featurised with a one-hot encoding of amino  
158 acid type, physicochemical and biochemical properties retrieved from the ExPaSY ProtScale [45]  
159 which includes 61 descriptors such as iso-electric points, mutability and transmembrane tendencies.  
160 Additional numerical features can be retrieved from AAIndex [46]. Low-dimensional embeddings  
161 of amino acid physicochemical properties are provided from Kidera et al. [47] and Meiler et al  
162 [48]. In addition to fixed embeddings, sequence embeddings can be retrieved from large pre-trained  
163 language models, such as the ESM-1b Transformer model [49] and BioVec [50]. Secondary structural  
164 information can be included via a one-hot encoded representation of eight state secondary structure  
165 and solvent accessibility metrics (ASA, RSA, SSA) computed by DSSP [51].  $x$ ,  $y$ ,  $z$  positions are  
166 added as node features. Functionality for user-defined node or edge features is also provided with  
167 useful utilities allowing for computation or aggregation of features over constituent chains. Figure  
168 2 illustrates an overview of the mesh and graph construction methods as well as the node and edge  
169 featurisation schemes; Figure 3 shows example visualisations of graph and meshes produced by  
170 Graphein.

### 171 3.1.2 Edge Representations

172 Graphein provides utilities in the high-level API for a number of edge-construction schemes. The  
173 low-level API provides a simple and intuitive way for users to define novel edge construction schemes.  
174 Edge construction methods are organised into distance-based, intramolecular interaction-based, and  
175 atomic structure-based submodules. Each of these edge construction methods are composable to

176 produce multirelational graphs. This is particularly useful for models that operate on different levels to  
177 capture varying aspects of the underlying network. As a motivating example, a multi-track approach  
178 has been successfully applied to the protein folding problem [52].

179 Functionality for computing intramolecular graph edges is provided through distance-based heuristics  
180 as well as through an optional dependency, GetContacts [53]. Euclidean distance-based edges can be  
181 computed with a user-defined threshold. Functionality for constructing  $k$ -nearest neighbour graphs,  
182 where two vertices are connected by an edge if they are among the  $k$  nearest neighbours by Euclidean  
183 distance is included. Graph edges can also be added on the basis of the Delaunay triangulation.  
184 Delaunay triangles correspond to joining points that share a face in the 3D Voronoi diagram of the  
185 protein structures. For distance-based edges, a Long Interaction Network (LIN) parameter controls  
186 the minimum required separation in the amino acid sequence for edge creation. This can be useful in  
187 reducing the number of noisy edges under distance-based edge creation schemes. Edge featurisation  
188 for atom-level graphs is provided by annotations of bond type and ring status.

### 189 3.2 Protein Structure Meshes

190 Geometric deep learning applied to surface representations of protein structures have demonstrated  
191 promise on a variety of tasks in the context of structural biology and structural interactomics [8, 54].  
192 The protein structure mesh module consists of a wrapper for PyMOL, a commonplace molecular  
193 informatics visualisation tool, and Pytorch3D [55]. PyMol is used to produce a .Obj file from either a  
194 PDB accession code or a provided .PDB file, enabling the use of pre-processed structures. Pytorch3D  
195 is used to produce a tensor-based representation of the protein surface as vertices and faces. Users  
196 can pass any desired parameters or commands controlling the surface calculation to PyMol via a  
197 configuration object. These parameters include specifying solvent inclusion, solvent probe radius,  
198 surface mode ( $\{triangles, dots\}$ ), surface quality (resolution of mesh). We provide sane defaults for  
199 first-time users. To our knowledge, this is the first application of PyTorch3D for protein structure  
200 data.

### 201 3.3 RNA Structures

202 Ribonucleic Acid (RNA) is a nucleotide biopolymer capable of forming higher-order structural ar-  
203 rangements through self-association mediated by complementary base pairing interactions. Graphein  
204 provides utilities for constructing secondary structure graphs of RNA structures, taking as input an  
205 RNA sequence and an associated string representation of the secondary structure in dotbracket nota-  
206 tion [56]. Graphs can be constructed using two types of bonding between nucleotides: phosphodiester  
207 bonds between adjacent bases, and base-pairing interactions between complementary bases specified  
208 by the dotbracket string (Figure 4). Graphein also supports addition of pseudoknots - structural motifs  
209 composed of interactions between intercalated hairpin loops specified in the dotbracket structure  
210 notation.

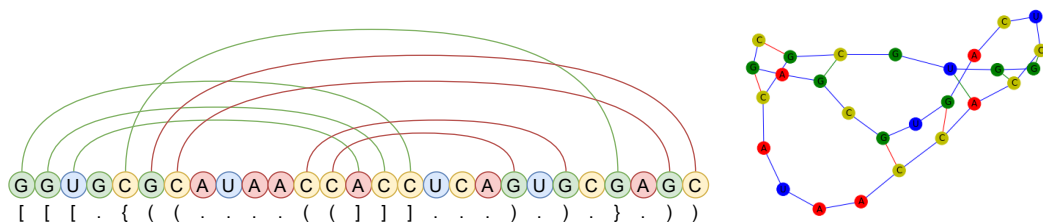

Figure 4: Example RNA Secondary Structure Graph. RNA Secondary structures can be represented as dotbracket strings and multi-relational graphs. Blue edges indicate phosphodiester backbone linkages, red edges indicate base-pairing interactions and green edges indicate pseudoknot pairings.

### 211 3.4 Interaction Networks

212 Interactomics presents a clear application of geometric deep learning as these data are fundamentally  
213 relational in structure. Biomolecular entities can be represented as nodes, and their associated func-

214 tional relationships and physical interactions can be represented as edges with associated metadata,  
215 such as the direction and nature of regulation. For a full discussion of applications, datasets and mod-  
216 elling techniques we refer readers to the reviews by [44] and [9]. Graphein implements interaction  
217 graph construction from protein-protein interaction and gene regulatory network databases. Interac-  
218 tion graphs integrate networks from several sources and can be constructed in a highly customisable  
219 way (see Supplementary Information B, C for a summary of user-definable parameters).

### 220 3.4.1 Protein-Protein Interaction Networks

221 Many of the functional roles of proteins are carried out by larger assemblies of protein complexes  
222 and many biological processes are regulated through interactions mediated by physical contacts.  
223 Understanding these functions is central to characterising healthy and diseased states of biological  
224 systems. Graphein interfaces with widely-used databases of biomolecular interaction data for easy  
225 retrieval and construction of graph-based representations of protein-protein interactions.

226 **STRING** is a database of more than 20 billion known and predicted functional and direct physical  
227 protein-protein interactions between 67.6 million proteins across 14,094 organisms [57]. Predicted  
228 interactions in STRING are derived from genomic context, high-throughput experimental procedures,  
229 conservation of co-expression, text-mining of the literature and aggregation from other databases.  
230 STRING is made freely available by the original authors under a Creative Commons BY 4.0 license.

231 **BioGRID** is a database of 2,127,726 protein and genetic interactions curated from 77,696 publications  
232 [58]. BioGRID is made available for academic and commercial use by the original authors under the  
233 MIT License.

### 234 3.4.2 Gene Regulatory Networks

235 Gene regulatory networks (GRNs) consist of collections of  
236 genes, transcription factors (TFs) and other regulatory elements,  
237 and their associated regulatory interactions. Reconstructing  
238 transcriptional regulatory networks is a long-standing problem  
239 in computational biology in its own right due to its relevance  
240 to characterising healthy and diseased states of cells, and these  
241 data can provide meaningful signal in other contexts such as  
242 multi-modal modelling of biological systems and phenomena.  
243 Graphein supports GRN graph construction from two widely-  
244 used databases, allowing users to easily unify datasets and  
245 construct graph representations of these networks.

246 **TRRUST** is a database of regulatory interactions for human and  
247 mouse interactomes curated from the literature via a sentence-  
248 based text-mining approach [59]. The current release contains  
249 8,427 / 6,490 regulatory interactions with associated regulatory  
250 directions (activation/repression) over 795 / 827 transcription  
251 factors and 2,067 / 1,629 non-transcription factor genes for hu-  
252 mans and mice, respectively. TRRUST is made freely available  
253 by the original authors for non-commercial research under a  
254 Creative Commons Attribution-ShareAlike 4.0 International  
255 License.

256 **RegNetwork** is a database of transcription-factor and miRNA mediated regulatory interactions for  
257 humans and mice [60]. RegNetwork is an aggregation of 25 source databases from which the  
258 regulatory network is populated and annotated. The latest release contains 14,981 / 94,876 TF-gene,  
259 361 / 129 TF-TF, 21,744 / 25,574 TF-miRNA, 171,477 / 176,512 miRNA-gene and 25,854 / 26,545  
260 miRNA-TF interactions over 1,456 / 1,328 transcription factors, 1,904 / 1,290 miRNAs and 19,719  
261 / 18,120 genes for humans and mice, respectively. The dataset is made publicly available by the  
262 original authors.

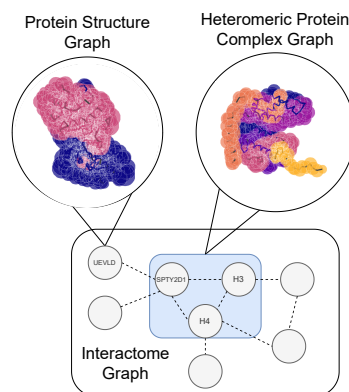

Figure 5: Graphein can facilitate the integration of structural and biomolecular interaction data to enable geometric deep learning research in structural interactomics. 3D visualisations of graphs are generated using Graphein.

## 263 4 Data

### 264 4.1 Database Interfaces

265 Graphein interfaces with a number of standard biological data repositories to retrieve data for each  
266 modality it supports (summarised in Table 1).

Table 1: Graphein database interfaces for data retrieval.

| Name                                 | Description                                                    |
|--------------------------------------|----------------------------------------------------------------|
| <b>Protein Structure</b>             |                                                                |
| Protein Data Bank (PDB)              | Experimentally-determined biomolecular structures              |
| AlphaFold Protein Structure Database | Protein structures modelled by AlphaFold2                      |
| <b>Protein-Protein Interaction</b>   |                                                                |
| BioGrid                              | Protein-protein interactions                                   |
| STRING                               | Protein-protein interactions                                   |
| <b>Gene Regulatory Network</b>       |                                                                |
| RegNetwork                           | TF & miRNA mediated regulatory interactions in humans and mice |
| TRRUST                               | Regulatory interactions in humans and mice.                    |

### 267 4.2 Example Datasets

268 As example workflows, we make available two graph-based protein structure datasets focussed on  
269 tasks where relational inductive biases appear intuitively useful and demonstrate how Graphein can  
270 help formulate different tasks from the same underlying dataset.

271 **PPISP - Protein Protein Interaction Site Prediction** The first, based on the collections outlined  
272 in [61], consists of 420 protein structures, with node labels indicating whether a residue is involved  
273 in a protein-protein interaction - a task central to structural interactomics [62]. The data originate  
274 from co-crystallised structures of the complexes in the RCSB PDB. The authors make available  
275 a set of additional node features based on Position-Specific Scoring Matrices (PSSMs), providing  
276 evolutionary context as to which protein-protein interaction sites are typically conserved, which can  
277 be incorporated with the structural node features calculated by Graphein. This dataset was used in  
278 [63] in conjunction with Graphein to compute the protein structure graph inputs to a Message-Passing  
279 Neural Process model which achieved state-of-the-art performance.

280 **PSCDB - Protein Structural Change Database** The second dataset, based on Protein Structural  
281 Change Database (PSCDB) [64], consists of 904 paired examples of bound and unbound protein struc-  
282 tures that undergo 7 classes of conformational rearrangement motion. Prediction of conformational  
283 rearrangement upon ligand binding is a longstanding problem in computational structural biology  
284 and has significant implications for drug discovery and development. Two tasks can be formulated  
285 with this dataset. The first is the graph classification task of predicting the type of motion a protein  
286 undergoes upon ligand binding, the second is framing prediction of the rearrangement itself as an  
287 edge prediction task between the paired bound and unbound protein structure graphs. These tasks  
288 provide utility in improving understanding of protein structural dynamics in drug development, where  
289 molecules are typically docked into largely rigid structures with limited flexibility in the binding  
290 pockets in high-throughput *in silico* screens. PSCDB is made publicly available by the original  
291 authors and we provide a processed version in our repository.

292 **ccPDB** We derive four datasets, each with a graph and a node classification task from the ccPDB  
293 [65]. The ccPDB provides collections of protein structures and annotations of interactions with  
294 various molecular species. The proteins are high-quality, non-redundant sets (25% sequence identity)  
295 with maximum resolution of 3 Å, minimum sequence length of 80 residues. Node-level annotations  
296 of interaction are provided in each case with the cutoff set at 4 Å. ccPDB is made freely available  
297 online.

298 • **PROTEINS\_METAL** contains protein structures that bind 7 types of metal ions (Fe, Mg, Ca,  
299 Mn, Zn, Co, Ni;  $n = 215 / 1,908 / 1,402 / 521 / 1,660 / 201 / 355$ ).



- 300 • PROTEINS\_NUCLEOTIDES contains protein structures that bind 8 species of nucleotides  
301 (ATP, ADP, GTP, GDP, NAD, FAD, FMN, UDP;  $n = 313 / 353 / 83 / 120 / 140 / 172 / 117 /$   
302 68)
- 303 • PROTEINS\_NUCLEIC contains protein structures that bind DNA or RNA polymers ( $n = 560$   
304 / 415).
- 305 • PROTEINS\_LIGAND contains protein structures that bind 7 species of ligands (SO<sub>4</sub>, PO<sub>4</sub>,  
306 NAG, HEM, BME, EDO, PLP;  $n = 3312 / 1299 / 727 / 176 / 191 / 1507 / 65$ ).

## 307 5 Benchmarks

308 To demonstrate the ease-of-use of Graphein we apply a selection of geometric deep learning models  
309 to protein structure graphs generated by Graphein to these datasets. In particular, we consider  
310 two graph construction schemes from the same dataset: one based on hydrogen and peptide bonds  
311 (Bond), and another based on K-Nearest Neighbours clustering of the residues (KNN). Full details  
312 of our experimental procedure are provided in Supplementary Information D. We consider a graph  
313 classification task on PSCDB, classifying structures on the basis of the type of structural rearrangement  
314 they undergo upon ligand binding. Our results show strong differences in performance between the  
315 two schemes and that these differences are architecture-dependent (Table 2). We suggest that this  
316 motivates further exploration of the role of graph construction in the context of structural biological  
317 data.

Table 2: Baseline results for PSCDB. The task is graph classification to predict the class of structural rearrangement a given protein undergoes upon ligand binding.

| Edge Type | Bond        |             | KNN         |             |
|-----------|-------------|-------------|-------------|-------------|
| Model     | Multi-ACC   | Macro-F1    | Multi-ACC   | Macro-F1    |
| GCN       | 0.221±0.009 | 0.110±0.062 | 0.261±0.111 | 0.154±0.084 |
| GraphSAGE | 0.170±0.091 | 0.078±0.046 | 0.247±0.133 | 0.136±0.090 |
| GAT       | 0.241±0.066 | 0.145±0.037 | 0.258±0.136 | 0.154±0.105 |

## 318 6 Machine Learning Utilities

319 **Conversion** Convenience utilities for converting between NetworkX [66] graph objects and  
320 commonly-used geometric deep learning library data objects are provided for DGL and PyTorch  
321 Geometric. Underlying graph objects are based on NetworkX, enabling conversion to other formats.

322 **Adjacency Tensors & Diffusion Matrices** Graphein provides utilities for computation of diffusion  
323 matrices (and related adjacency matrices) to (1) facilitate exploration of biological data with models  
324 that leverage these representations, and (2) aid in the construction of diffusion matrices for graph  
325 neural networks.

326 **Visualisation** Built-in tools are provided for each of the modalities supported to allow inspection of  
327 data in pre and post-processing. Interactive visualisation tools are provided for protein structures.

## 328 7 Usage

329 Example usage and workflows are provided in the documentation at: [www.graphein.ai](http://www.graphein.ai). Examples  
330 and tutorials are provided as runnable notebooks detailing use of the high and low-level APIs for the  
331 data modalities currently supported by Graphein, and the ease of ingesting novel structural datasets  
332 into a suite of geometric deep learning benchmarks (see section 5). Source code is made available via  
333 GitHub: [www.github.com/a-r-j/graphein](http://www.github.com/a-r-j/graphein).

## 334 8 Conclusion

335 Geometric deep learning has shown promise in computational biology and structural biology. How-  
336 ever, the availability of processed datasets is a research bottleneck. Graphein is a Python library

337 designed to facilitate construction of datasets for geometric deep learning applied to biomolecular  
338 structures and interactions. By providing tools for these modalities, we hope to facilitate research in  
339 data-driven structural interactomics. In addition, we make available two datasets for protein-protein  
340 interaction site prediction (node classification) and protein conformational rearrangement prediction  
341 (graph classification and edge prediction).

342 A current limitation of the library is the lack of support for some informative features based on  
343 evolutionary information. For example, the PPISP dataset provides PSSMs and the protein folding  
344 model, AlphaFold2 is heavily reliant on Multiple Sequence Alignments presenting clear utility for  
345 the addition of these features. Whilst graphs are a natural representation of biological interaction data,  
346 hypergraphs may provide a higher-fidelity representation of the underlying biological relationships.  
347 Many interactions are contextual, which can be represented by hyperedges between several entities  
348 required for a functional or structural relationship. We are also interested in addressing representations  
349 of dynamics, both in structural data and in interactions as these are central biological components that  
350 are beyond the scope of the initial release. These features will be included in subsequent releases and  
351 the API design of Graphein makes it simple for users to write and contribute their own workflows.  
352 Graphein implements a high-level and low-level API to enable rapid and fine-grained control of data  
353 preparation. Graphein is provided as Free Open Source Software under a permissive MIT License  
354 which we hope will encourage the community to contribute customised workflows to the library. We  
355 hope that Graphein serves to further progress in the field and reduce friction in processing structural  
356 and interaction data for geometric deep learning. The library also provides utility in preparing protein  
357 structure and interactomics graphs for graph-theoretic and topological data analyses.

## 358 Acknowledgments and Disclosure of Funding

359 We thank Ben Day, Paul Scherer and Cristian Bodnar for useful feedback on the manuscript and  
360 project. We thank Sean Aubin for contributing the interactive visualisation code for protein structure  
361 graphs. We thank our users for bug reports, feature suggestions and their support. ARJ is funded by a  
362 BBSRC DTP studentship. DH has received funding from both the Wellcome Trust and the United  
363 Kingdom Medical Research Council (MRC). TLB thanks the Wellcome Trust for an Investigator  
364 Award (200814/Z/16/Z; 2016 -) for support of this research.

## 365 References

- 366 [1] Michael M. Bronstein, Joan Bruna, Yann LeCun, Arthur Szlam, and Pierre Vandergheynst.  
367 Geometric deep learning: going beyond euclidean data. 2016. doi: 10.1109/MSP.2017.2693418.
- 368 [2] Alex Fout, Jonathon Byrd, Basir Shariat, and Asa Ben-Hur. Protein interface prediction using  
369 graph convolutional networks. In *Proceedings of the 31st International Conference on Neural  
370 Information Processing Systems, NIPS'17*, page 6533–6542, Red Hook, NY, USA, 2017. Curran  
371 Associates Inc. ISBN 9781510860964.
- 372 [3] Wen Torng and Russ B. Altman. Graph convolutional neural networks for predicting drug-target  
373 interactions. *Journal of Chemical Information and Modeling*, 59(10):4131–4149, October 2019.  
374 doi: 10.1021/acs.jcim.9b00628. URL <https://doi.org/10.1021/acs.jcim.9b00628>.
- 375 [4] Vladimir Gligorijevic, P. Douglas Renfrew, Tomasz Kosciolok, Julia Koehler Leman,  
376 Kyunghyun Cho, Tommi Vatanen, Daniel Berenberg, Bryn Taylor, Ian M. Fisk, Ram-  
377 nik J. Xavier, Rob Knight, and Richard Bonneau. Structure-based function prediction us-  
378 ing graph convolutional networks. October 2019. doi: 10.1101/786236. URL <https://doi.org/10.1101/786236>.
- 380 [5] Michael Uhl, Van Dinh Tran, and Rolf Backofen. GraphProt2: A novel deep learning-based  
381 method for predicting binding sites of RNA-binding proteins. November 2019. doi: 10.1101/  
382 850024. URL <https://doi.org/10.1101/850024>.
- 383 [6] Rafael Zamora-Resendiz and Silvia Crivelli. Structural learning of proteins using graph con-  
384 volutional neural networks. April 2019. doi: 10.1101/610444. URL <https://doi.org/10.1101/610444>.
- 386 [7] Soumya Sanyal, Ivan Anishchenko, Anirudh Dagar, David Baker, and Partha Talukdar. Prote-  
387 inGCN: Protein model quality assessment using graph convolutional networks. April 2020. doi:  
388 10.1101/2020.04.06.028266. URL <https://doi.org/10.1101/2020.04.06.028266>.
- 389 [8] P. Gainza, F. Sverrisson, F. Monti, E. Rodolà, D. Boscaiini, M. M. Bronstein, and B. E. Correia.  
390 Deciphering interaction fingerprints from protein molecular surfaces using geometric deep  
391 learning. *Nature Methods*, December 2019. doi: 10.1038/s41592-019-0666-6. URL <https://doi.org/10.1038/s41592-019-0666-6>.
- 393 [9] Thomas Gaudelot, Ben Day, Arian R Jamasb, Jyothish Soman, Cristian Regep, Gertrude Liu,  
394 Jeremy B R Hayter, Richard Vickers, Charles Roberts, Jian Tang, David Roblin, Tom L Blundell,  
395 Michael M Bronstein, and Jake P Taylor-King. Utilizing graph machine learning within drug  
396 discovery and development. *Briefings in Bioinformatics*, 05 2021. ISSN 1477-4054. doi:  
397 10.1093/bib/bbab159. URL <https://doi.org/10.1093/bib/bbab159>. bbab159.
- 398 [10] Minjie Wang, Lingfan Yu, Da Zheng, Quan Gan, Yu Gai, Zihao Ye, Mufei Li, Jinjing Zhou,  
399 Qi Huang, Chao Ma, Ziyue Huang, Qipeng Guo, Hao Zhang, Haibin Lin, Junbo Zhao, Jinyang  
400 Li, Alexander J Smola, and Zheng Zhang. Deep graph library: Towards efficient and scalable  
401 deep learning on graphs. *ICLR Workshop on Representation Learning on Graphs and Manifolds*,  
402 2019. URL <https://arxiv.org/abs/1909.01315>.
- 403 [11] Matthias Fey and Jan E. Lenssen. Fast graph representation learning with PyTorch Geometric.  
404 In *ICLR Workshop on Representation Learning on Graphs and Manifolds*, 2019.

- 405 [12] Helen M. Berman, John Westbrook, Zukang Feng, Gary Gilliland, T. N. Bhat, Helge Weissig,  
406 Ilya N. Shindyalov, and Philip E. Bourne. The Protein Data Bank. *Nucleic Acids Research*, 28  
407 (1):235–242, 01 2000. ISSN 0305-1048. doi: 10.1093/nar/28.1.235. URL [https://doi.org/  
408 10.1093/nar/28.1.235](https://doi.org/10.1093/nar/28.1.235).
- 409 [13] John Jumper, Richard Evans, Alexander Pritzel, Tim Green, Michael Figurnov, Olaf Ron-  
410 neberger, Kathryn Tunyasuvunakool, Russ Bates, Augustin Žídek, Anna Potapenko, Alex  
411 Bridgland, Clemens Meyer, Simon A. A. Kohl, Andrew J. Ballard, Andrew Cowie, Bernardino  
412 Romera-Paredes, Stanislav Nikolov, Rishub Jain, Jonas Adler, Trevor Back, Stig Petersen,  
413 David Reiman, Ellen Clancy, Michal Zielinski, Martin Steinegger, Michalina Pacholska, Tamas  
414 Berghammer, Sebastian Bodenstern, David Silver, Oriol Vinyals, Andrew W. Senior, Ko-  
415 ray Kavukcuoglu, Pushmeet Kohli, and Demis Hassabis. Highly accurate protein structure  
416 prediction with AlphaFold. *Nature*, July 2021. doi: 10.1038/s41586-021-03819-2. URL  
417 <https://doi.org/10.1038/s41586-021-03819-2>.
- 418 [14] Matthew Ragoza, Joshua Hochuli, Elisa Idrobo, Jocelyn Sunseri, and David Ryan Koes.  
419 Protein–ligand scoring with convolutional neural networks. *Journal of Chemical Informa-  
420 tion and Modeling*, 57(4):942–957, April 2017. doi: 10.1021/acs.jcim.6b00740. URL  
421 <https://doi.org/10.1021/acs.jcim.6b00740>.
- 422 [15] Rin Sato and Takashi Ishida. Protein model accuracy estimation based on local structure quality  
423 assessment using 3d convolutional neural network. *PLOS ONE*, 14(9):e0221347, September  
424 2019. doi: 10.1371/journal.pone.0221347. URL [https://doi.org/10.1371/journal.  
425 pone.0221347](https://doi.org/10.1371/journal.pone.0221347).
- 426 [16] Limeng Pu, Rajiv Gandhi Govindaraj, Jeffrey Mitchell Lemoine, Hsiao-Chun Wu, and Michal  
427 Brylinski. DeepDrug3d: Classification of ligand-binding pockets in proteins with a convolu-  
428 tional neural network. *PLOS Computational Biology*, 15(2):e1006718, February 2019. doi: 10.  
429 1371/journal.pcbi.1006718. URL <https://doi.org/10.1371/journal.pcbi.1006718>.
- 430 [17] Douglas EV Pires, Raquel C de Melo-Minardi, Marcos A dos Santos, Carlos H da Silveira,  
431 Marcelo M Santoro, and Wagner Meira. Cutoff scanning matrix (CSM): structural classification  
432 and function prediction by protein inter-residue distance patterns. *BMC Genomics*, 12(S4),  
433 December 2011. doi: 10.1186/1471-2164-12-s4-s12. URL [https://doi.org/10.1186/  
434 1471-2164-12-s4-s12](https://doi.org/10.1186/1471-2164-12-s4-s12).
- 435 [18] Douglas E. V. Pires, David B. Ascher, and Tom L. Blundell. mCSM: predicting the ef-  
436 fects of mutations in proteins using graph-based signatures. *Bioinformatics*, 30(3):335–342,  
437 November 2013. doi: 10.1093/bioinformatics/btt691. URL [https://doi.org/10.1093/  
438 bioinformatics/btt691](https://doi.org/10.1093/bioinformatics/btt691).
- 439 [19] Tammy M. K. Cheng, Yu-En Lu, Michele Vendruscolo, Pietro Lió, and Tom L. Blundell.  
440 Prediction by graph theoretic measures of structural effects in proteins arising from non-  
441 synonymous single nucleotide polymorphisms. *PLoS Computational Biology*, 4(7):e1000135,  
442 July 2008. doi: 10.1371/journal.pcbi.1000135. URL [https://doi.org/10.1371/journal.  
443 pcbi.1000135](https://doi.org/10.1371/journal.pcbi.1000135).
- 444 [20] Broto Chakrabarty, Varun Naganathan, Kanak Garg, Yash Agarwal, and Nita Parekh. NAPS  
445 update: network analysis of molecular dynamics data and protein–nucleic acid complexes.  
446 *Nucleic Acids Research*, 47(W1):W462–W470, May 2019. doi: 10.1093/nar/gkz399. URL  
447 <https://doi.org/10.1093/nar/gkz399>.
- 448 [21] M. S. Vijayabaskar, V. Niranjana, and Saraswathi Vishveshwara. Grapprostr - graphs of protein  
449 structures: A tool for constructing the graphs and generating graph parameters for protein  
450 structures. 2011.
- 451 [22] Adam Paszke, Sam Gross, Francisco Massa, Adam Lerer, James Bradbury, Gregory Chanan,  
452 Trevor Killeen, Zeming Lin, Natalia Gimelshein, Luca Antiga, et al. Pytorch: An imperative  
453 style, high-performance deep learning library. *Advances in neural information processing  
454 systems*, 32:8026–8037, 2019.

- 455 [23] Peter W. Battaglia, Jessica B. Hamrick, Victor Bapst, Alvaro Sanchez-Gonzalez, Vinicius Zam-  
456 baldi, Mateusz Malinowski, Andrea Tacchetti, David Raposo, Adam Santoro, Ryan Faulkner,  
457 Caglar Gulcehre, Francis Song, Andrew Ballard, Justin Gilmer, George Dahl, Ashish Vaswani,  
458 Kelsey Allen, Charles Nash, Victoria Langston, Chris Dyer, Nicolas Heess, Daan Wierstra,  
459 Pushmeet Kohli, Matt Botvinick, Oriol Vinyals, Yujia Li, and Razvan Pascanu. Relational  
460 inductive biases, deep learning, and graph networks, 2018.
- 461 [24] Deepmind. Sonnet. <https://github.com/deepmind/sonnet>, 2017.
- 462 [25] Martín Abadi, Paul Barham, Jianmin Chen, Zhifeng Chen, Andy Davis, Jeffrey Dean, Matthieu  
463 Devin, Sanjay Ghemawat, Geoffrey Irving, Michael Isard, et al. Tensorflow: A system for  
464 large-scale machine learning. In *12th {USENIX} symposium on operating systems design and  
465 implementation ({OSDI} 16)*, pages 265–283, 2016.
- 466 [26] Jonathan Godwin\*, Thomas Keck\*, Peter Battaglia, Victor Bapst, Thomas Kipf, Yujia Li,  
467 Kimberly Stachenfeld, Petar Veličković, and Alvaro Sanchez-Gonzalez. Jraph: A library for  
468 graph neural networks in jax., 2020. URL <http://github.com/deepmind/jraph>.
- 469 [27] James Bradbury, Roy Frostig, Peter Hawkins, Matthew James Johnson, Chris Leary, Dougal  
470 Maclaurin, George Necula, Adam Paszke, Jake VanderPlas, Skye Wanderman-Milne, and  
471 Qiao Zhang. JAX: composable transformations of Python+NumPy programs, 2018. URL  
472 <http://github.com/google/jax>.
- 473 [28] Mufei Li, Jinjing Zhou, Jiajing Hu, Wenxuan Fan, Yangkang Zhang, Yaxin Gu, and George  
474 Karypis. Dgl-lifesci: An open-source toolkit for deep learning on graphs in life science, 2021.
- 475 [29] Bharath Ramsundar, Peter Eastman, Patrick Walters, Vijay Pande, Karl Leswing, and Zhenqin  
476 Wu. *Deep Learning for the Life Sciences*. O’Reilly Media, 2019. [https://www.amazon.com/  
477 Deep-Learning-Life-Sciences-Microscopy/dp/1492039837](https://www.amazon.com/Deep-Learning-Life-Sciences-Microscopy/dp/1492039837).
- 478 [30] URL <https://torchdrug.ai/>.
- 479 [31] Kexin Huang, Tianfan Fu, Wenhao Gao, Yue Zhao, Yusuf Roohani, Jure Leskovec, Connor W  
480 Coley, Cao Xiao, Jimeng Sun, and Marinka Zitnik. Therapeutics data commons: Machine  
481 learning datasets and tasks for drug discovery and development. *NeurIPS Track on Datasets  
482 and Benchmarks*, 2021.
- 483 [32] Weihua Hu, Matthias Fey, Marinka Zitnik, Yuxiao Dong, Hongyu Ren, Bowen Liu, Michele  
484 Catasta, and Jure Leskovec. Open graph benchmark: Datasets for machine learning on graphs,  
485 2020.
- 486 [33] Christopher Morris, Nils M. Kriege, Franka Bause, Kristian Kersting, Petra Mutzel, and Marion  
487 Neumann. Tudataset: A collection of benchmark datasets for learning with graphs. In *ICML  
488 2020 Workshop on Graph Representation Learning and Beyond (GRL+ 2020)*, 2020. URL  
489 [www.graphlearning.io](http://www.graphlearning.io).
- 490 [34] Paul D. Dobson and Andrew J. Doig. Distinguishing enzyme structures from non-enzymes  
491 without alignments. *Journal of Molecular Biology*, 330(4):771–783, July 2003. doi: 10.1016/  
492 s0022-2836(03)00628-4. URL [https://doi.org/10.1016/s0022-2836\(03\)00628-4](https://doi.org/10.1016/s0022-2836(03)00628-4).
- 493 [35] Nino Shervashidze, Pascal Schweitzer, Erik Jan van Leeuwen, Kurt Mehlhorn, and Karsten M.  
494 Borgwardt. Weisfeiler-lehman graph kernels. *Journal of Machine Learning Research*, 12(77):  
495 2539–2561, 2011. URL <http://jmlr.org/papers/v12/shervashidze11a.html>.
- 496 [36] I. Schomburg. BRENDA, the enzyme database: updates and major new developments. *Nucleic  
497 Acids Research*, 32(90001):431D–433, January 2004. doi: 10.1093/nar/gkh081. URL [https://  
498 doi.org/10.1093/nar/gkh081](https://doi.org/10.1093/nar/gkh081).
- 499 [37] Raphael J. L. Townshend, Martin Vögele, Patricia Suriana, Alexander Derry, Alexander Powers,  
500 Yianni Laloudakis, Sidhika Balachandar, Bowen Jing, Brandon Anderson, Stephan Eismann,  
501 Risi Kondor, Russ B. Altman, and Ron O. Dror. Atom3d: Tasks on molecules in three  
502 dimensions, 2020.

- 503 [38] M.S. Vijayabaskar. GraProStr – graphs of protein structures: A tool for constructing the  
504 graphs and generating graph parameters for protein structures. *The Open Bioinformatics*  
505 *Journal*, 5(1):53–58, February 2011. doi: 10.2174/1875036201105010053. URL <https://doi.org/10.2174/1875036201105010053>.  
506
- 507 [39] Prabhu Ramachandran and Gael Varoquaux. Mayavi: 3d visualization of scientific data.  
508 *Computing in Science & Engineering*, 13(2):40–51, March 2011. doi: 10.1109/mcse.2011.35.  
509 URL <https://doi.org/10.1109/mcse.2011.35>.
- 510 [40] Renzo Angles, Mauricio Arenas-Salinas, Roberto García, Jose Antonio Reyes-Suarez, and  
511 Ehmke Pohl. GSP4pdb: a web tool to visualize, search and explore protein-ligand structural  
512 patterns. *BMC Bioinformatics*, 21(S2), March 2020. doi: 10.1186/s12859-020-3352-x. URL  
513 <https://doi.org/10.1186/s12859-020-3352-x>.
- 514 [41] Roman A. Laskowski and Mark B. Swindells. LigPlot: Multiple ligand–protein interaction  
515 diagrams for drug discovery. *Journal of Chemical Information and Modeling*, 51(10):2778–2786,  
516 October 2011. doi: 10.1021/ci200227u. URL <https://doi.org/10.1021/ci200227u>.
- 517 [42] Joseph Feinstein, Wentao Shi, J. Ramanujam, and Michal Brylinski. Bionoi: A voronoi  
518 diagram-based representation of ligand-binding sites in proteins for machine learning applica-  
519 tions. In *Methods in Molecular Biology*, pages 299–312. Springer US, 2021. doi: 10.1007/  
520 978-1-0716-1209-5\_17. URL [https://doi.org/10.1007/978-1-0716-1209-5\\_17](https://doi.org/10.1007/978-1-0716-1209-5_17).
- 521 [43] Kathryn Tunyasuvunakool, Jonas Adler, Zachary Wu, Tim Green, Michal Zielinski, Au-  
522 gustin Židek, Alex Bridgland, Andrew Cowie, Clemens Meyer, Agata Laydon, Sameer  
523 Velankar, Gerard J. Kleywegt, Alex Bateman, Richard Evans, Alexander Pritzel, Michael  
524 Figurnov, Olaf Ronneberger, Russ Bates, Simon A. A. Kohl, Anna Potapenko, Andrew J.  
525 Ballard, Bernardino Romera-Paredes, Stanislav Nikolov, Rishub Jain, Ellen Clancy, David  
526 Reiman, Stig Petersen, Andrew W. Senior, Koray Kavukcuoglu, Ewan Birney, Pushmeet  
527 Kohli, John Jumper, and Demis Hassabis. Highly accurate protein structure prediction  
528 for the human proteome. *Nature*, July 2021. doi: 10.1038/s41586-021-03828-1. URL  
529 <https://doi.org/10.1038/s41586-021-03828-1>.
- 530 [44] Stephen Bonner, Ian P Barrett, Cheng Ye, Rowan Swiers, Ola Engkvist, Andreas Bender,  
531 Charles Tapley Hoyt, and William Hamilton. A review of biomedical datasets relating to drug  
532 discovery: A knowledge graph perspective, 2021.
- 533 [45] Elisabeth Gasteiger, Christine Hoogland, Alexandre Gattiker, Severine Duvaud, Marc R.  
534 Wilkins, Ron D. Appel, and Amos Bairoch. Protein identification and analysis tools on the Ex-  
535 PASy server. In *The Proteomics Protocols Handbook*, pages 571–607. Humana Press, 2005. doi:  
536 10.1385/1-59259-890-0:571. URL <https://doi.org/10.1385/1-59259-890-0:571>.
- 537 [46] S. Kawashima, P. Pokarowski, M. Pokarowska, A. Kolinski, T. Katayama, and M. Kanehisa.  
538 AAindex: amino acid index database, progress report 2008. *Nucleic Acids Research*, 36  
539 (Database):D202–D205, December 2007. doi: 10.1093/nar/gkm998. URL <https://doi.org/10.1093/nar/gkm998>.  
540
- 541 [47] Akinori Kidera, Yasuo Konishi, Masahito Oka, Tatsuo Ooi, and Harold A. Scheraga. Statistical  
542 analysis of the physical properties of the 20 naturally occurring amino acids. *Journal of*  
543 *Protein Chemistry*, 4(1):23–55, February 1985. doi: 10.1007/bf01025492. URL <https://doi.org/10.1007/bf01025492>.  
544
- 545 [48] Jens Meiler, Anita Zeidler, Felix Schmuschke, and Michael Muller. Generation and evaluation of  
546 dimension-reduced amino acid parameter representations by artificial neural networks. *Journal*  
547 *of Molecular Modeling*, 7(9):360–369, September 2001. doi: 10.1007/s008940100038. URL  
548 <https://doi.org/10.1007/s008940100038>.
- 549 [49] Alexander Rives, Joshua Meier, Tom Sercu, Siddharth Goyal, Zeming Lin, Jason Liu, Demi Guo,  
550 Myle Ott, C. Lawrence Zitnick, Jerry Ma, and Rob Fergus. Biological structure and function  
551 emerge from scaling unsupervised learning to 250 million protein sequences. *Proceedings of the*  
552 *National Academy of Sciences*, 118(15), 2021. ISSN 0027-8424. doi: 10.1073/pnas.2016239118.  
553 URL <https://www.pnas.org/content/118/15/e2016239118>.

- 554 [50] Ehsaneddin Asgari and Mohammad R. K. Mofrad. Continuous distributed representation  
555 of biological sequences for deep proteomics and genomics. *PLOS ONE*, 10(11):e0141287,  
556 November 2015. doi: 10.1371/journal.pone.0141287. URL [https://doi.org/10.1371/  
557 journal.pone.0141287](https://doi.org/10.1371/journal.pone.0141287).
- 558 [51] Wolfgang Kabsch and Christian Sander. Dictionary of protein secondary structure: Pattern recog-  
559 nition of hydrogen-bonded and geometrical features. *Biopolymers*, 22(12):2577–2637, Decem-  
560 ber 1983. doi: 10.1002/bip.360221211. URL <https://doi.org/10.1002/bip.360221211>.
- 561 [52] Minkyung Baek, Frank DiMaio, Ivan Anishchenko, Justas Dauparas, Sergey Ovchinnikov,  
562 Gyu Rie Lee, Jue Wang, Qian Cong, Lisa N. Kinch, R. Dustin Schaeffer, Claudia Millán,  
563 Hahnbeom Park, Carson Adams, Caleb R. Glassman, Andy DeGiovanni, Jose H. Pereira,  
564 Andria V. Rodrigues, Alberdina A. van Dijk, Ana C. Ebrecht, Diederik J. Opperman, Theo  
565 Sagmeister, Christoph Buhlheller, Tea Pavkov-Keller, Manoj K. Rathinaswamy, Udit Dalwadi,  
566 Calvin K. Yip, John E. Burke, K. Christopher Garcia, Nick V. Grishin, Paul D. Adams, Randy J.  
567 Read, and David Baker. Accurate prediction of protein structures and interactions using a three-  
568 track neural network. *Science*, 373(6557):871–876, July 2021. doi: 10.1126/science.abj8754.  
569 URL <https://doi.org/10.1126/science.abj8754>.
- 570 [53] GetContacts. Getcontacts. URL <https://getcontacts.github.io/>.
- 571 [54] Bowen Dai and Chris Bailey-Kellogg. Protein interaction interface region prediction by geo-  
572 metric deep learning. *Bioinformatics*, March 2021. doi: 10.1093/bioinformatics/btab154. URL  
573 <https://doi.org/10.1093/bioinformatics/btab154>.
- 574 [55] Schrödinger, LLC. The PyMOL molecular graphics system, version 1.8. November 2015.
- 575 [56] I. L. Hofacker, W. Fontana, P. F. Stadler, L. S. Bonhoeffer, M. Tacker, and P. Schuster. Fast  
576 folding and comparison of RNA secondary structures. *Monatshefte für Chemie Chemical  
577 Monthly*, 125(2):167–188, February 1994. doi: 10.1007/bf00818163. URL [https://doi.  
578 org/10.1007/bf00818163](https://doi.org/10.1007/bf00818163).
- 579 [57] Damian Szklarczyk, Annika L Gable, Katerina C Nastou, David Lyon, Rebecca Kirsch, Sampo  
580 Pyysalo, Nadezhda T Doncheva, Marc Legeay, Tao Fang, Peer Bork, Lars J Jensen, and Christian  
581 von Mering. The STRING database in 2021: customizable protein–protein networks, and  
582 functional characterization of user-uploaded gene/measurement sets. *Nucleic Acids Research*,  
583 49(D1):D605–D612, 11 2020. ISSN 0305-1048. doi: 10.1093/nar/gkaa1074. URL <https://doi.org/10.1093/nar/gkaa1074>.
- 584
- 585 [58] Rose Oughtred, Jennifer Rust, Christie Chang, Bobby-Joe Breitkreutz, Chris Stark, Andrew  
586 Willems, Lorrie Boucher, Genie Leung, Nadine Kolas, Frederick Zhang, Sonam Dolma, Jasmin  
587 Coulombe-Huntington, Andrew Chatr-aryamontri, Kara Dolinski, and Mike Tyers. The biogrid  
588 database: A comprehensive biomedical resource of curated protein, genetic, and chemical  
589 interactions. *Protein Science*, 30(1):187–200, 2021. doi: <https://doi.org/10.1002/pro.3978>. URL  
590 <https://onlinelibrary.wiley.com/doi/abs/10.1002/pro.3978>.
- 591 [59] Heonjong Han, Jae-Won Cho, Sangyoung Lee, Ayoung Yun, Hyojin Kim, Dasom Bae, Sunmo  
592 Yang, Chan Yeong Kim, Muyoung Lee, Eunbeen Kim, Sungho Lee, Byunghee Kang, Dabin  
593 Jeong, Yaeji Kim, Hyeon-Nae Jeon, Haein Jung, Sunhwee Nam, Michael Chung, Jong-Hoon  
594 Kim, and Insuk Lee. TRRUST v2: an expanded reference database of human and mouse tran-  
595 scriptional regulatory interactions. *Nucleic Acids Research*, 46(D1):D380–D386, 10 2017. ISSN  
596 0305-1048. doi: 10.1093/nar/gkx1013. URL <https://doi.org/10.1093/nar/gkx1013>.
- 597 [60] Zhi-Ping Liu, Canglin Wu, Hongyu Miao, and Hulin Wu. RegNetwork: an integrated database  
598 of transcriptional and post-transcriptional regulatory networks in human and mouse. *Database*,  
599 2015, 09 2015. ISSN 1758-0463. doi: 10.1093/database/bav095. URL [https://doi.org/  
600 10.1093/database/bav095](https://doi.org/10.1093/database/bav095). bav095.
- 601 [61] Min Zeng, Fuhao Zhang, Fang-Xiang Wu, Yaohang Li, Jianxin Wang, and Min Li. Protein-  
602 protein interaction site prediction through combining local and global features with deep  
603 neural networks. *Bioinformatics*, September 2019. doi: 10.1093/bioinformatics/btz699. URL  
604 <https://doi.org/10.1093/bioinformatics/btz699>.

- 605 [62] Arian R. Jamasb, Ben Day, Cătălina Cangea, Pietro Liò, and Tom L. Blundell. *Deep learning*  
606 *for Protein–Protein Interaction Site Prediction*, pages 263–288. Springer US, New York,  
607 NY, 2021. ISBN 978-1-0716-1641-3. doi: 10.1007/978-1-0716-1641-3\_16. URL [https://doi.org/10.1007/978-1-0716-1641-3\\_16](https://doi.org/10.1007/978-1-0716-1641-3_16).  
608
- 609 [63] Ben Day, Cătălina Cangea, Arian R. Jamasb, and Pietro Liò. Message passing neural processes,  
610 2020.
- 611 [64] T. Amemiya, R. Koike, A. Kidera, and M. Ota. PSCDB: a database for protein structural  
612 change upon ligand binding. *Nucleic Acids Research*, 40(D1):D554–D558, November 2011.  
613 doi: 10.1093/nar/gkr966. URL <https://doi.org/10.1093/nar/gkr966>.
- 614 [65] Piyush Agrawal, Sumeet Patiyal, Rajesh Kumar, Vinod Kumar, Harinder Singh, Pawan Kumar  
615 Raghav, and Gajendra P S Raghava. ccPDB 2.0: an updated version of datasets created  
616 and compiled from Protein Data Bank. *Database*, 2019, 01 2019. ISSN 1758-0463. doi:  
617 10.1093/database/bay142. URL <https://doi.org/10.1093/database/bay142>. bay142.
- 618 [66] Aric A. Hagberg, Daniel A. Schult, and Pieter J. Swart. Exploring network structure, dynamics,  
619 and function using networkx. In Gaël Varoquaux, Travis Vaught, and Jarrod Millman, editors,  
620 *Proceedings of the 7th Python in Science Conference*, pages 11 – 15, Pasadena, CA USA, 2008.



## 621 Checklist

- 622 1. For all authors...
  - 623 (a) Do the main claims made in the abstract and introduction accurately reflect the paper's  
624 contributions and scope? **[Yes]**
  - 625 (b) Did you describe the limitations of your work? **[Yes]** **Yes, please see the conclusion**  
626 **(Section 8).**
  - 627 (c) Did you discuss any potential negative societal impacts of your work? **[Yes]** **Please**  
628 **see Supplementary Information E**
  - 629 (d) Have you read the ethics review guidelines and ensured that your paper conforms to  
630 them? **[Yes]** **We have read the ethics review guidelines.**
- 631 2. If you are including theoretical results...
  - 632 (a) Did you state the full set of assumptions of all theoretical results? **[N/A]** **We are not**  
633 **including theoretical results.**
  - 634 (b) Did you include complete proofs of all theoretical results? **[N/A]** **We are not including**  
635 **theoretical results.**
- 636 3. If you ran experiments (e.g. for benchmarks)...
  - 637 (a) Did you include the code, data, and instructions needed to reproduce the main ex-  
638 perimental results (either in the supplemental material or as a URL)? **[Yes]** **Please**  
639 **see the repository: <https://www.github.com/a-r-j/graphein> and documen-**  
640 **tation: [www.graphein.ai](http://www.graphein.ai)**
  - 641 (b) Did you specify all the training details (e.g., data splits, hyperparameters, how they  
642 were chosen)? **[Yes]** **A full description is given in Supplementary Information D**
  - 643 (c) Did you report error bars (e.g., with respect to the random seed after running experi-  
644 ments multiple times)? **[Yes]** **Please see Table 2.**
  - 645 (d) Did you include the total amount of compute and the type of resources used (e.g.,  
646 type of GPUs, internal cluster, or cloud provider)? **[Yes]** **Please see Supplementary**  
647 **Information D.**
- 648 4. If you are using existing assets (e.g., code, data, models) or curating/releasing new assets...
  - 649 (a) If your work uses existing assets, did you cite the creators? **[Yes]** **We have cited the**  
650 **appropriate creators in the text.**
  - 651 (b) Did you mention the license of the assets? **[Yes]** **We have described the licensing**  
652 **conditions in the text.**
  - 653 (c) Did you include any new assets either in the supplemental material or as a URL?  
654 **[Yes]** **Please see our repository: <https://www.github.com/a-r-j/graphein>**  
655 **and documentation: [graphein.ai](http://graphein.ai)**
  - 656 (d) Did you discuss whether and how consent was obtained from people whose data you're  
657 using/curating? **[Yes]** **We use publicly available data and specify the original**  
658 **licenses.**
  - 659 (e) Did you discuss whether the data you are using/curating contains personally identifiable  
660 information or offensive content? **[N/A]** **No datasets include personally identifiable**  
661 **information or offensive content.**
- 662 5. If you used crowdsourcing or conducted research with human subjects...
  - 663 (a) Did you include the full text of instructions given to participants and screenshots, if  
664 applicable? **[N/A]** **We do not use crowdsourcing or human subjects.**
  - 665 (b) Did you describe any potential participant risks, with links to Institutional Review  
666 Board (IRB) approvals, if applicable? **[N/A]** **We do not use crowdsourcing or**  
667 **human subjects.**
  - 668 (c) Did you include the estimated hourly wage paid to participants and the total amount  
669 spent on participant compensation? **[N/A]** **We do not use crowdsourcing or human**  
670 **subjects.**
